# Supplementary material for: Preparing a dual-function BiVO4/NiFe-LDH composite photoanode for enhanced photoelectrocatalytic wastewater treatment and simultaneous hydrogen evolution
Source: Royal Society of Chemistry journal article supplement (doi:10.1039/d2nj02210a), 2022-01-01
Supplement: d2nj02210a1.pdf [file d2nj02210a1.pdf]

1  
2  
3  
4  
5  
6  
7  
8  
9  
10  
11  
12  
13  
14  
15

## Supporting Information

### Preparing a dual-function BiVO<sub>4</sub>/NiFe-LDH composite photoanode for enhanced photoelectrocatalytic wastewater treatment and simultaneous hydrogen evolution

Sumin Cong<sup>a</sup>, Jiuhe Yu<sup>a</sup>, Baojun Liu<sup>b</sup>, Wei Teng<sup>a\*</sup>, Yubin Tang<sup>a\*</sup>

<sup>a</sup>Department of Environmental and Chemical Engineering, Jiangsu University of  
Science and Technology, Zhenjiang, 212003, P. R. China

<sup>b</sup>College of Resource and Environmental Engineering, Guizhou University, Guizhou  
Karst Environmental Ecosystems Observation and Research Station, Key Laboratory  
of Karst Georesources and Environment, Ministry of Education, Guiyang 550025,  
China

\* *Corresponding author.*

*E-mail: tengw@just.edu.cn (Wei Teng) ; ybbill@163.com (Yubin Tang)*

Summary: This document contains 22 pages, including 15 figures, 5 tables and 1 video.

16

**Table. S1.** The corresponding preparation conditions for the different electrodes.

| <b>Electrodes</b>                    | <b>Number of cycles</b> | <b>Calcination temperature</b> |
|--------------------------------------|-------------------------|--------------------------------|
| BiVO <sub>4</sub> /NiFe              | 15                      | 500 °C                         |
| BiVO <sub>4</sub> /NiFe-10C          | 10                      | 500 °C                         |
| BiVO <sub>4</sub> /NiFe-15C          | 15                      | 500 °C                         |
| BiVO <sub>4</sub> /NiFe-20C          | 20                      | 500 °C                         |
| BiVO <sub>4</sub> /NiFe-non-calcined | 15                      | -                              |
| BiVO <sub>4</sub> /NiFe-300 °C       | 15                      | 300 °C                         |
| BiVO <sub>4</sub> /NiFe-400 °C       | 15                      | 400 °C                         |
| BiVO <sub>4</sub> /NiFe-500 °C       | 15                      | 500 °C                         |
| BiVO <sub>4</sub> /NiFe-600 °C       | 15                      | 600 °C                         |

17

18

19 **Table. S2.** Reaction kinetic constants and correlation coefficients of different electrodes in PEC  
 20 degradation process.

| <b>Electrodes</b>                    | <b>K (min<sup>-1</sup>)</b> | <b>R<sup>2</sup></b> |
|--------------------------------------|-----------------------------|----------------------|
| Ni foam                              | 0.00273                     | 0.991                |
| NiFe-LDH                             | 0.00441                     | 0.963                |
| BiVO <sub>4</sub> @Ni foam           | 0.00691                     | 0.992                |
| BiVO <sub>4</sub> /NiFe;             | 0.01281                     | 0.985                |
| BiVO <sub>4</sub> /NiFe-15C;         |                             |                      |
| BiVO <sub>4</sub> /NiFe-500 °C       |                             |                      |
| BiVO <sub>4</sub> /NiFe-10C          | 0.00681                     | 0.997                |
| BiVO <sub>4</sub> /NiFe-20C          | 0.00845                     | 0.984                |
| BiVO <sub>4</sub> /NiFe-non-calcined | 0.00239                     | 0.993                |
| BiVO <sub>4</sub> /NiFe-300 °C       | 0.0032                      | 0.989                |
| BiVO <sub>4</sub> /NiFe-400 °C       | 0.0044                      | 0.990                |
| BiVO <sub>4</sub> /NiFe-600 °C       | 0.00567                     | 0.993                |

21

22

23

24

25

26

27

28

29

30

31 **Table. S3.** Reaction kinetic constants and correlation coefficients of BiVO<sub>4</sub>/NiFe electrode at  
32 different voltages in PEC degradation process.

| Voltage | K (min <sup>-1</sup> ) | R <sup>2</sup> |
|---------|------------------------|----------------|
| 0.2 V   | 0.00549                | 0.996          |
| 0.4 V   | 0.00838                | 0.989          |
| 0.6 V   | 0.01281                | 0.985          |
| 0.8 V   | 0.01688                | 0.986          |
| 1.0 V   | 0.02062                | 0.982          |

33  
34  
35  
36  
37  
38  
39  
40  
41  
42  
43  
44  
45  
46  
47  
48  
49  
50  
51

52 **Table. S4.** Reaction kinetic constants and correlation coefficients of BiVO<sub>4</sub>/NiFe electrode at  
53 different pH in PEC degradation process.

| <b>pH</b> | <b>K (min<sup>-1</sup>)</b> | <b>R<sup>2</sup></b> |
|-----------|-----------------------------|----------------------|
| 5.5       | 0.01095                     | 0.991                |
| 6.5       | 0.02528                     | 0.961                |
| 7.5       | 0.01281                     | 0.985                |
| 8.5       | 0.00676                     | 0.981                |
| 9.5       | 0.00891                     | 0.975                |

54

55

56

57

58

59

60

61

62

63

64

65

66

67 **Table. S5.** Reaction kinetic constants and correlation coefficients of BiVO<sub>4</sub>/NiFe electrode in

68 different degradation processes.

| <b>Process</b>  | <b>K (min<sup>-1</sup>)</b> | <b>R<sup>2</sup></b> |
|-----------------|-----------------------------|----------------------|
| Photolysis      | 0.00045                     | 0.976                |
| Dark adsorption | 0.00049                     | 0.973                |
| PC              | 0.00202                     | 0.994                |
| PEC             | 0.01281                     | 0.985                |
| EC              | 0.00217                     | 0.976                |

69

70

71

72

73

74

75

76

77

78

79

80

81

82

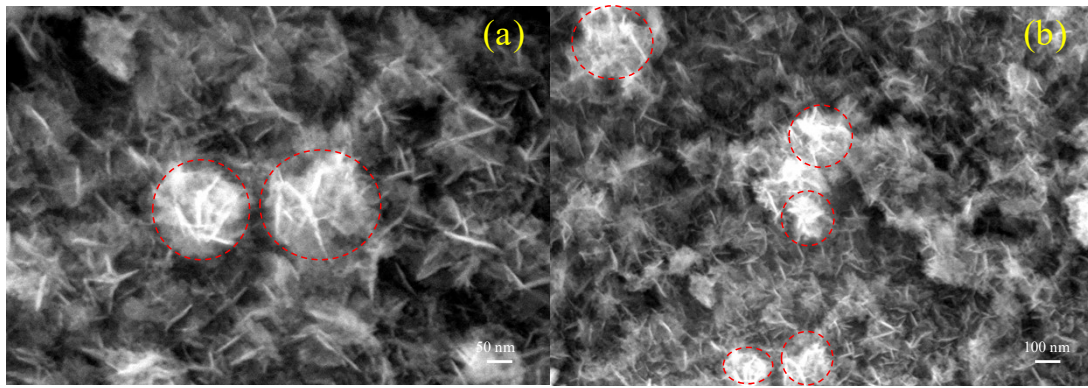

83

84

**Fig. S1.** SEM images of BiVO<sub>4</sub>/NiFe electrode after PEC process.

85

86

87

88

89

90

91

92

93

94

95

96

97

98

99

100

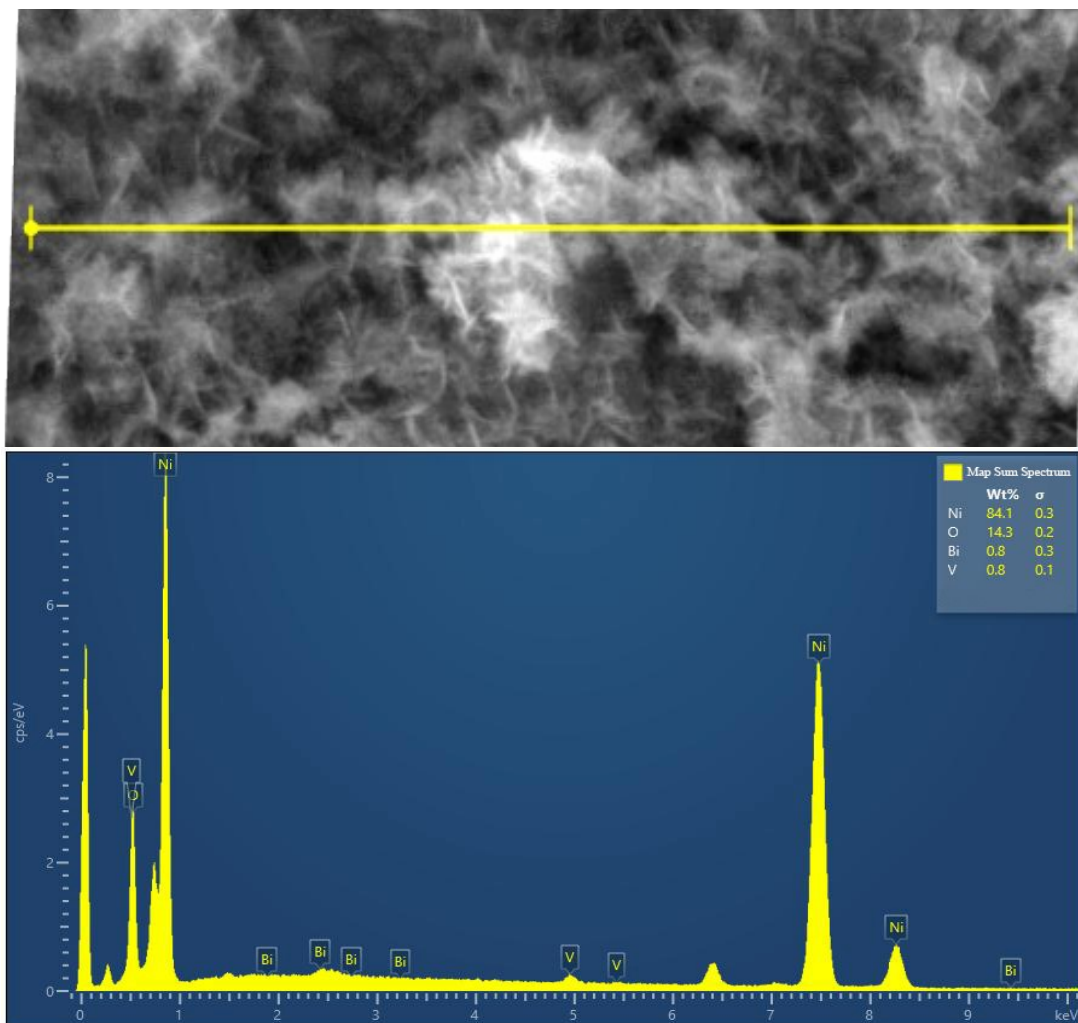

101

102

**Fig. S2.** The EDS line scanning of BiVO<sub>4</sub>/NiFe electrode.

103

104

105

106

107

108

109

110



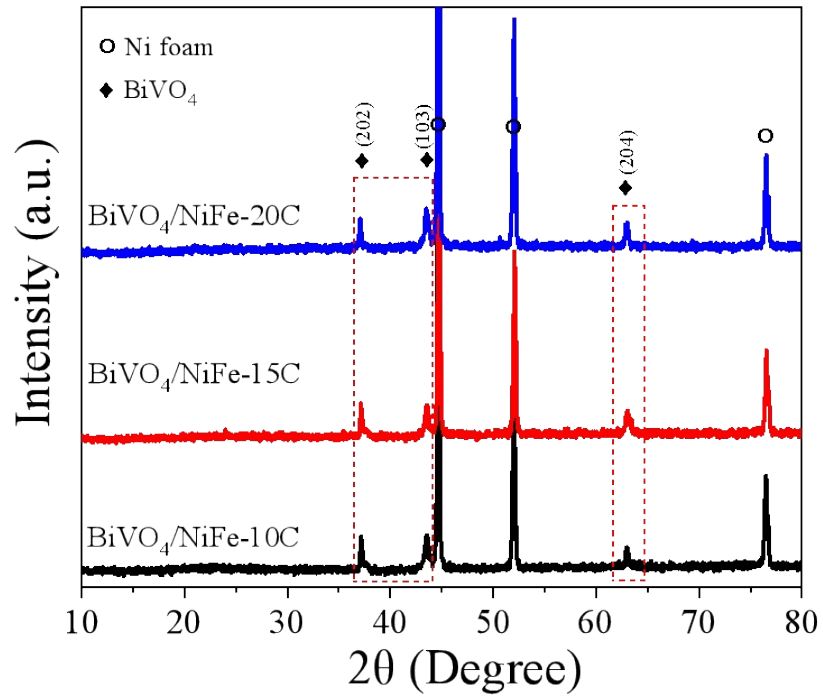

111

112

**Fig. S3.** XRD patterns of BiVO<sub>4</sub>/NiFe electrodes prepared under different cycles.

113

114

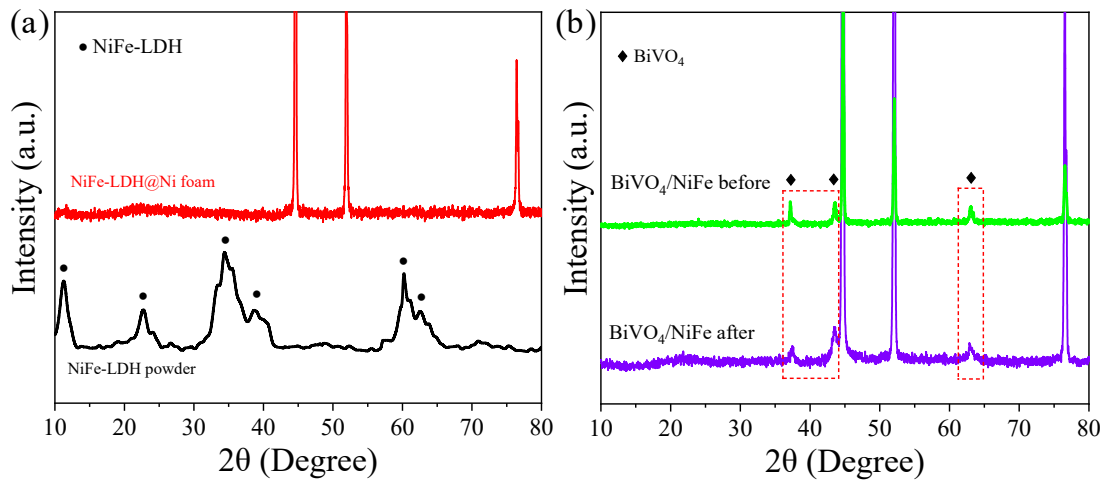

115

116 **Fig. S4.** XRD patterns of (a) NiFe-LDH@Ni foam and NiFe-LDH powder; (b) BiVO<sub>4</sub>/NiFe

117

electrode before use and BiVO<sub>4</sub>/NiFe electrode after use.

118

119

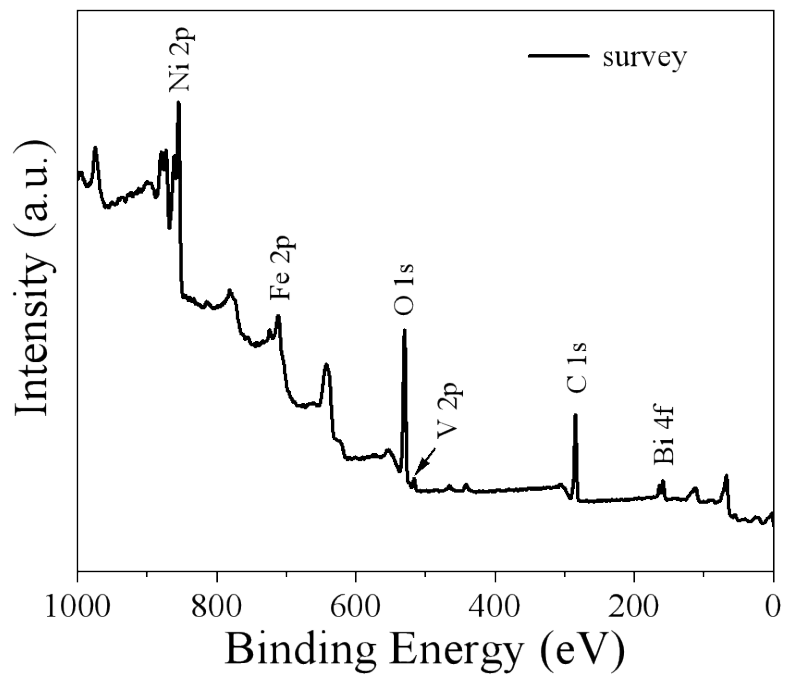

120

121

122

123

**Fig. S5.** XPS survey spectrum of BiVO<sub>4</sub>/NiFe electrode.

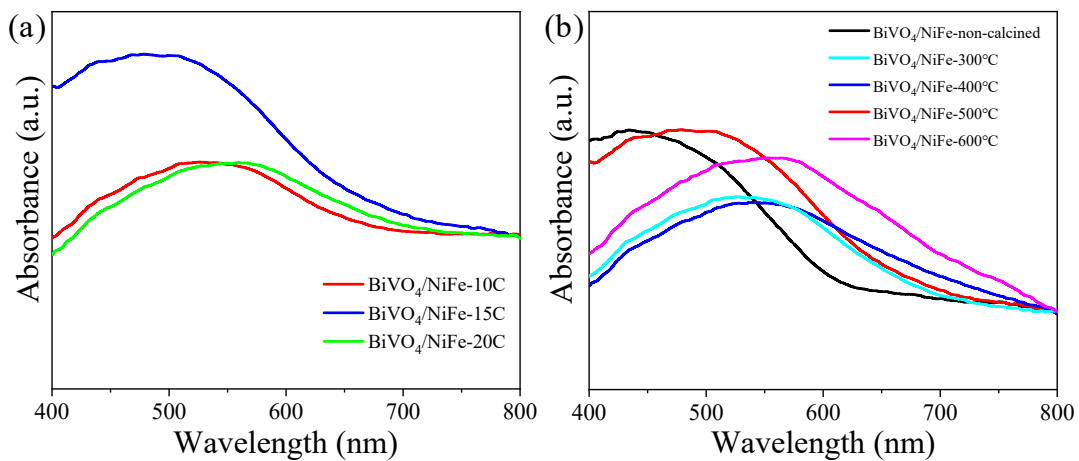

124

125 **Fig. S6.** UV-vis DRS spectra of BiVO<sub>4</sub>/NiFe electrodes prepared under (a) different cycles and (b)

126

different calcination temperature.

127

128

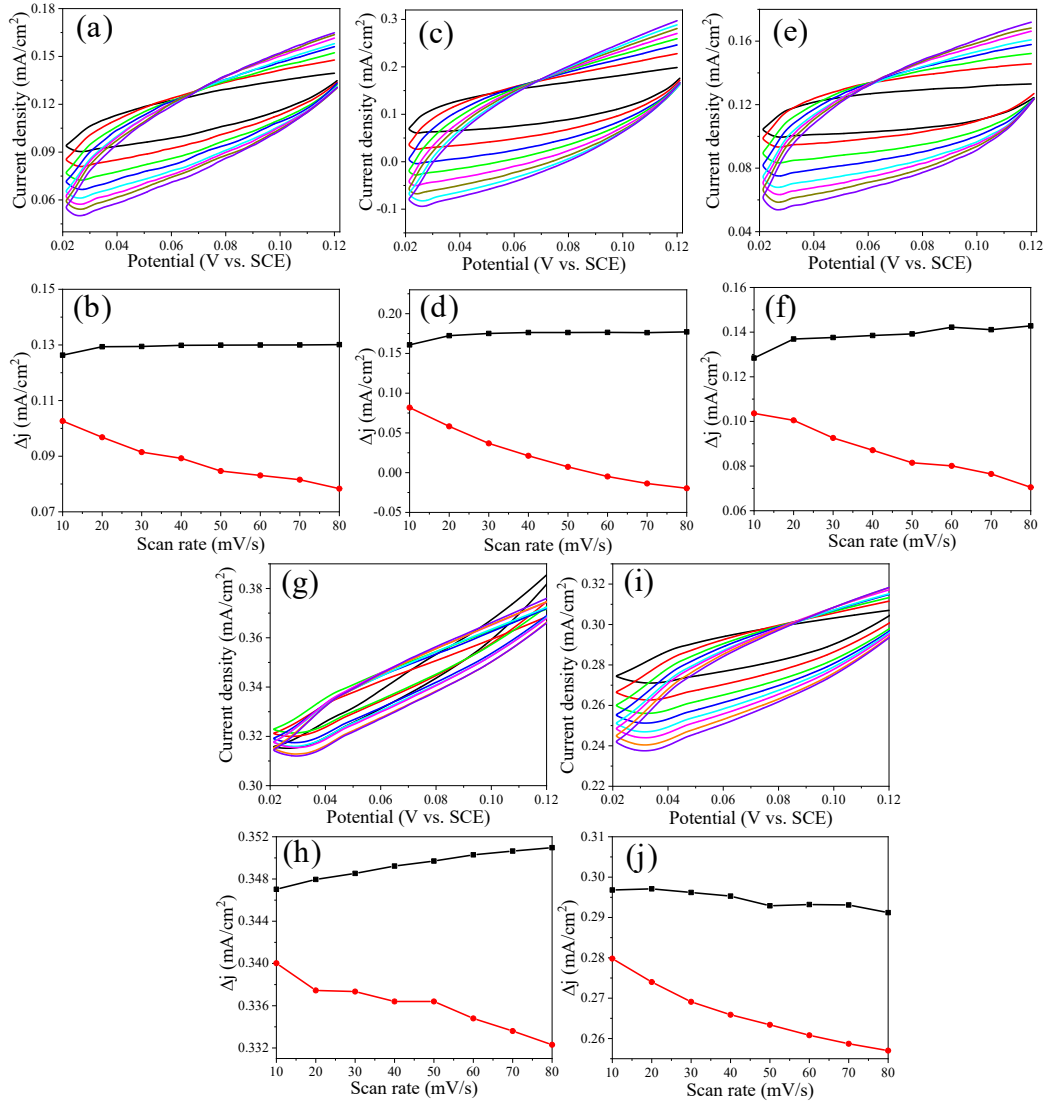

129

130 **Fig. S7.** CV curves and corresponding current density diagram at 0.07 V (vs. SCE) of different

131 samples: (a-b) BiVO<sub>4</sub>/NiFe-10C, (c-d) BiVO<sub>4</sub>/NiFe-15C, (e-f) BiVO<sub>4</sub>/NiFe-20C, (g-h) NiFe-LDH,

132

(i-j) BiVO<sub>4</sub>@Ni foam.

133

134

135

136

137

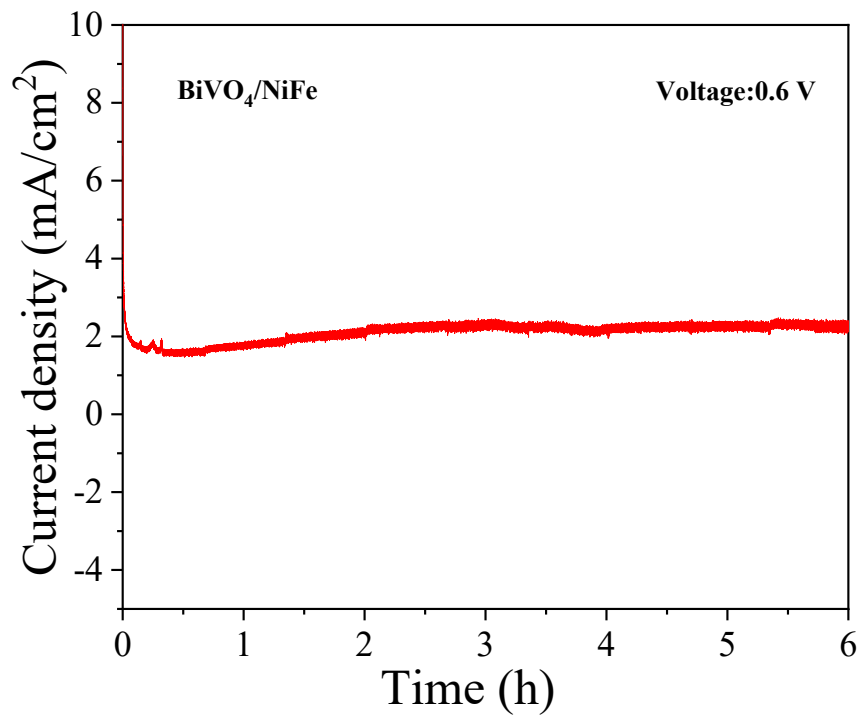

138

139 **Fig. S8.** Chronocurrent curve of BiVO<sub>4</sub>/NiFe electrode under visible light irradiation at 0.6 V (vs.

140

SCE) in 6 h.

141

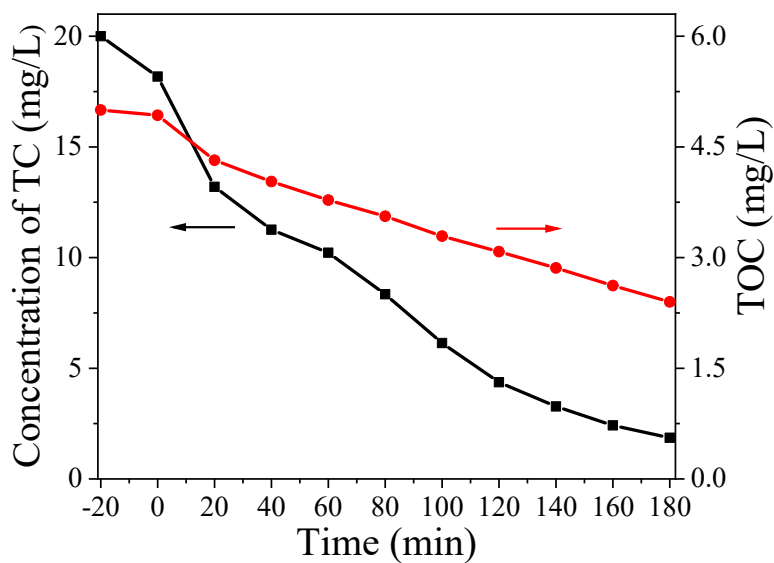

143

144 **Fig. S9.** TC concentration and TOC removal during PEC degradation using BiVO<sub>4</sub>/NiFe electrode.

145

146

147

148

149

150

151

152

153

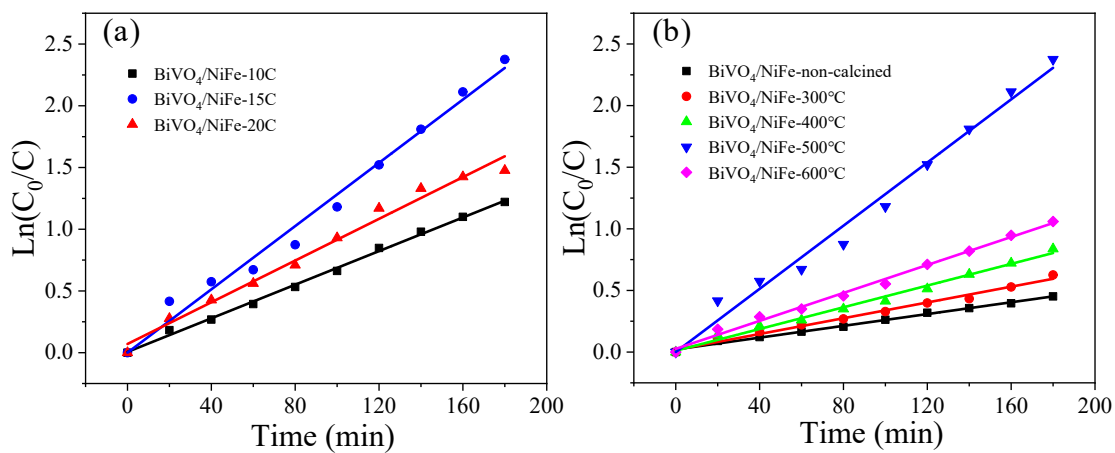

154

155 **Fig. S10.** The degradation kinetic plots of BiVO<sub>4</sub>/NiFe electrodes prepared under (a) different

156 cycles and (b) different calcination temperature.

157

158



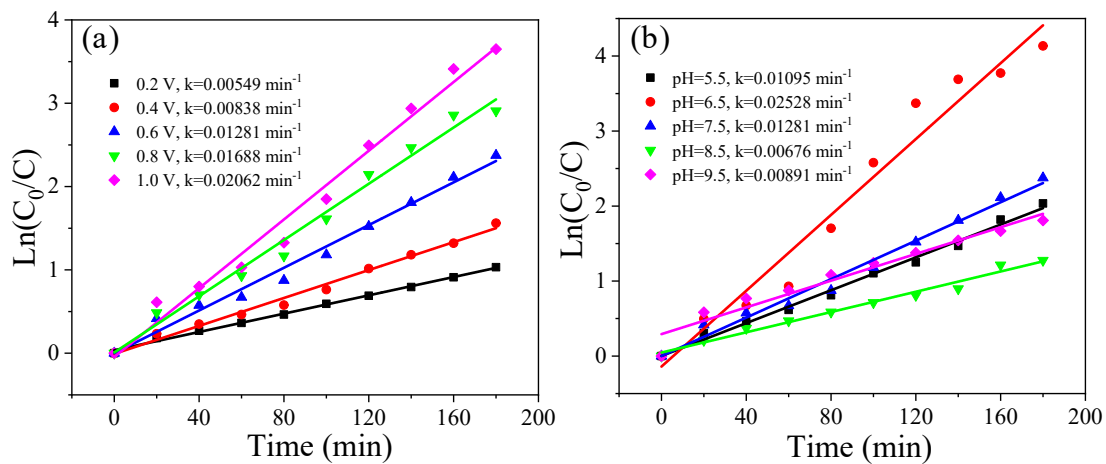

159

160 **Fig. S11.** The degradation kinetic plots of BiVO<sub>4</sub>/NiFe electrode under (a) different voltage and (b)

161

different pH.

162

163

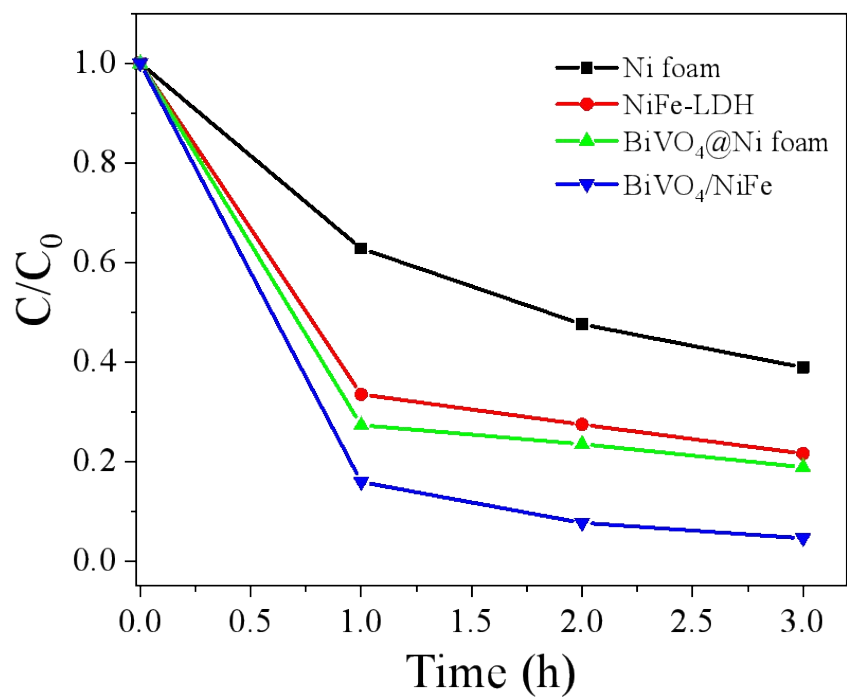

164

165 **Fig. S12.** The TC degradation efficiency of different samples during the PEC hydrogen evolution

166

process.

167

168

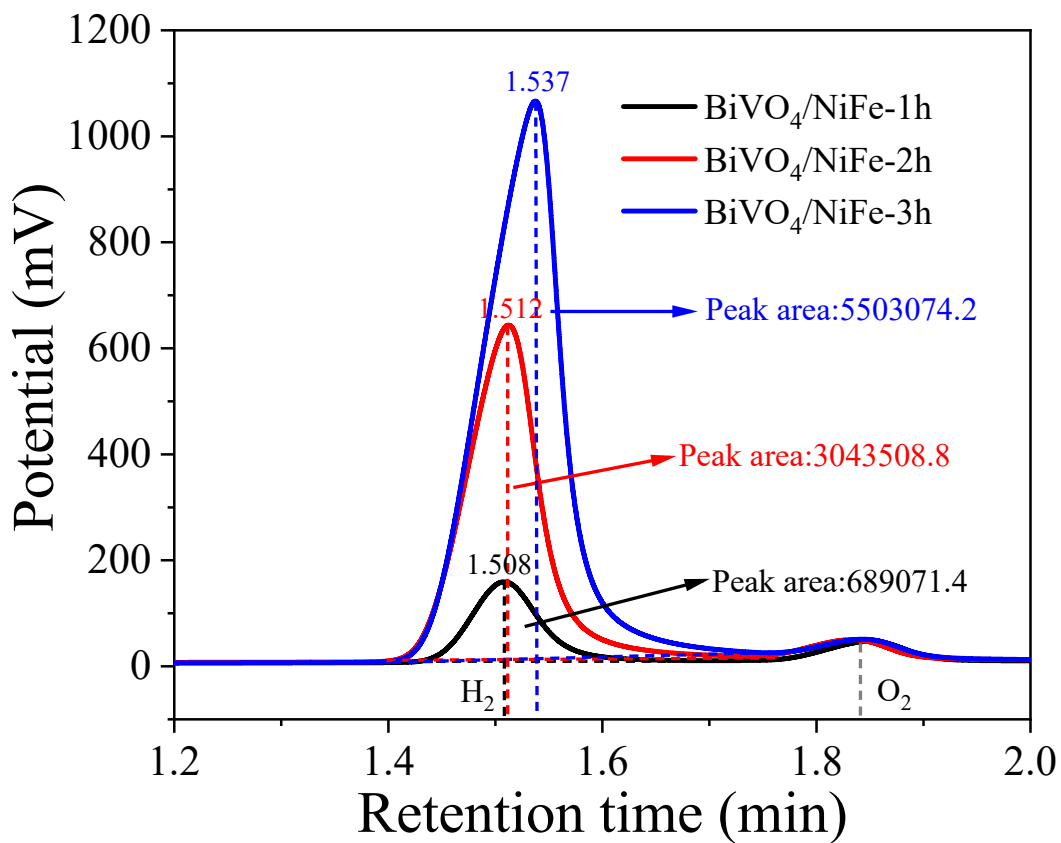

169

170 **Fig. S13.** GC spectra of hydrogen evolved at cathode in the PEC process using BiVO<sub>4</sub>/NiFe

171

photoanode.

172

173

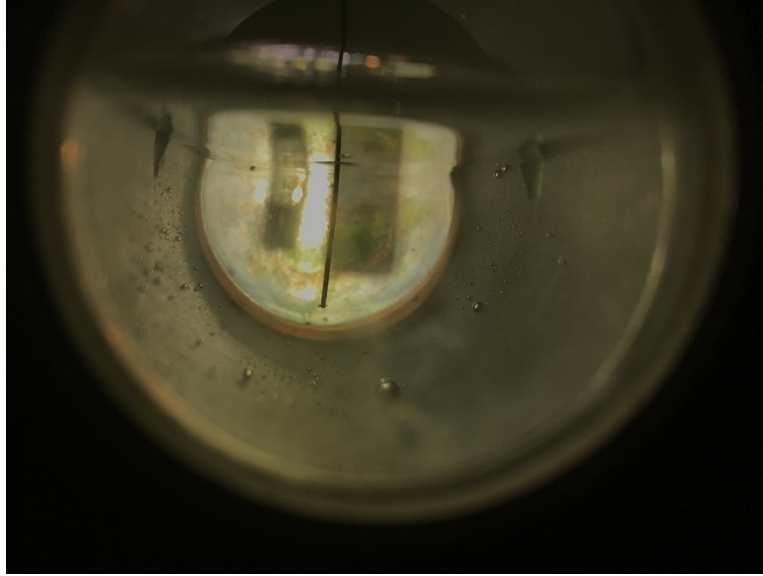

174

175

**Fig. S14.** The actual picture of hydrogen evolution in the PEC process.

176

177

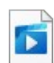

IMG\_1312.MP4

178

179

**Fig. S15.** The video of hydrogen evolution under sunlight irradiation.

180

181

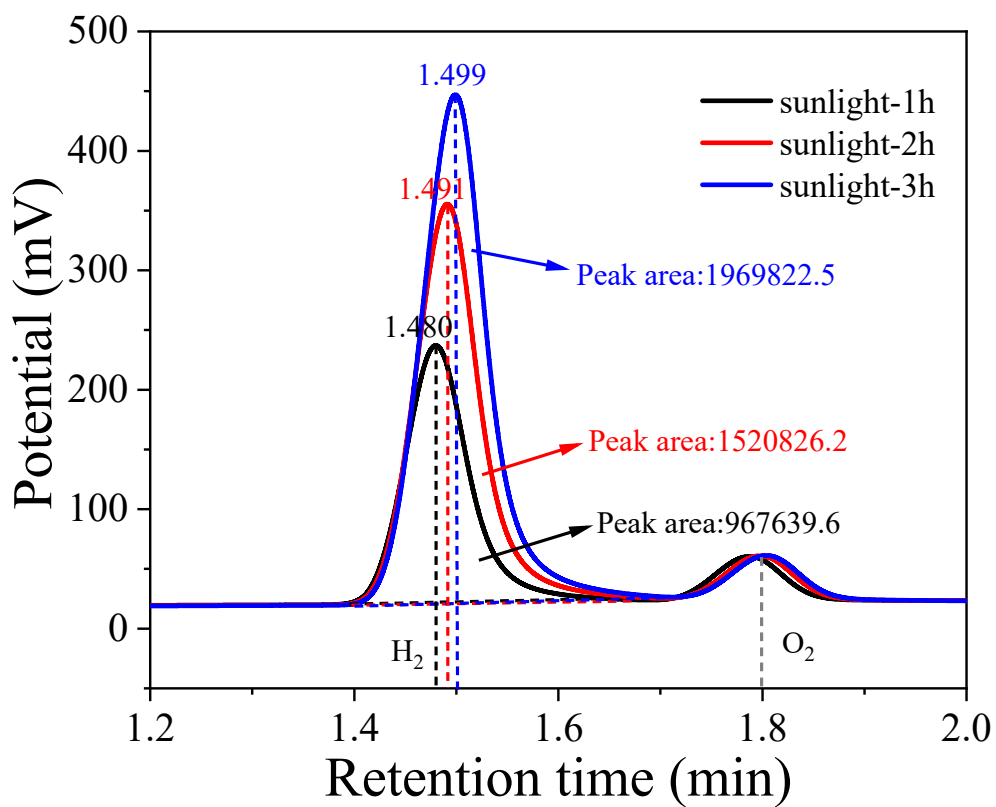

182

183 **Fig. S16.** GC spectra of hydrogen evolved at cathode under sunlight irradiation using BiVO<sub>4</sub>/NiFe

184

photoanode.

185

186
